# Supplementary material for: Apoptosis effects of imperatorin on synoviocytes in rheumatoid arthritis through mitochondrial/caspase-mediated pathways
Source: Royal Society of Chemistry journal article supplement (doi:10.1039/c7fo01748k), 2018-01-01
Supplement: c7fo01748k1.pdf [file c7fo01748k1.pdf]

Supplementary Figure 1

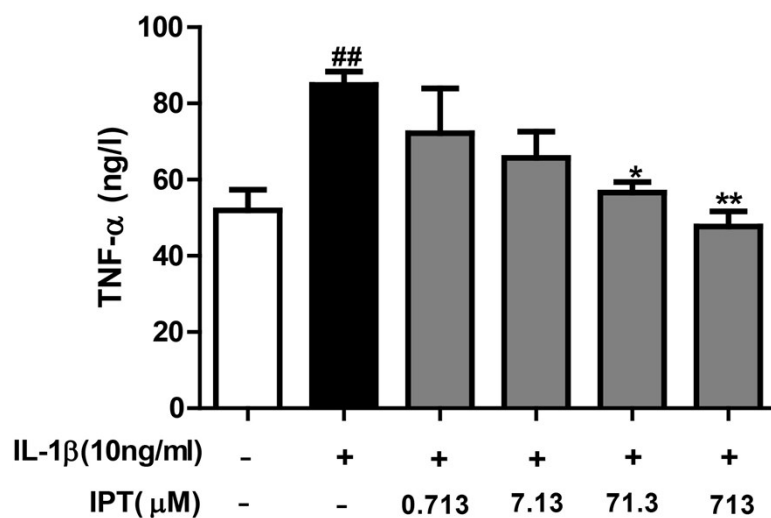

**Supplementary Figure 1. IPT inhibited TNF- $\alpha$  expressions in IL-1 $\beta$ -induced RA-FLSs.** IL-1 $\beta$ -induced cells were treated with indicated concentrations of IPT (0.713–713  $\mu$ M) for 48 h. The culture supernatants were subjected to ELISA analysis. Data are shown as mean  $\pm$  SEM from three independent experiments. ## $P$  < 0.01 vs. control; \* $P$  < 0.05, \*\* $P$  < 0.01 vs. IL-1 $\beta$ -induced group.
